# Supplementary material
Source: PubMed Central journal article supplement (PMC5612432)
Supplement: NIHMS850078-supplement-supplement_1.pdf [file NIHMS850078-supplement-supplement_1.pdf]

Table S-1. Results of multivariate logistic regressions for cross-influence of each isolation type and smoking status.

| Variables                                      | Model 1               |                       |  | Model 2               |                      |  | Model 3               |                       |  |
|------------------------------------------------|-----------------------|-----------------------|--|-----------------------|----------------------|--|-----------------------|-----------------------|--|
|                                                | Cigarette             | Avoided               |  | Cigarette             | Withdrawn            |  | Cigarette             | External              |  |
| <i>Level 1: Within Person</i>                  |                       |                       |  |                       |                      |  |                       |                       |  |
| <i>Baseline effects</i>                        |                       |                       |  |                       |                      |  |                       |                       |  |
| Cigarette Use <sub>t-1</sub> (ρ)               | 1.531 ***<br>(0.100)  | -0.260<br>(0.168)     |  | 1.744 ***<br>(0.097)  | 0.243 +<br>(0.142)   |  | 1.154 ***<br>(0.074)  | -0.143 **<br>(0.050)  |  |
| Avoided <sub>t-1</sub> (ρ)                     | -0.242 +<br>(0.129)   | 1.319 ***<br>(0.082)  |  |                       |                      |  |                       |                       |  |
| Withdrawn <sub>t-1</sub> (ρ)                   |                       |                       |  | 0.080<br>(0.113)      | 0.707 ***<br>(0.099) |  |                       |                       |  |
| External <sub>t-1</sub> (ρ)                    |                       |                       |  |                       |                      |  | 0.080<br>(0.053)      | -0.440 ***<br>(0.041) |  |
| Grade                                          | 0.772 ***<br>(0.037)  | 0.046<br>(0.033)      |  | 0.678 ***<br>(0.035)  | -0.025<br>(0.033)    |  | 0.560 ***<br>(0.023)  | -0.079 ***<br>(0.013) |  |
| <i>High School Effects (ref=Middle School)</i> |                       |                       |  |                       |                      |  |                       |                       |  |
| HSxCigarette <sub>t-1</sub> (ρ)                | -0.076<br>(0.112)     | 0.486 **<br>(0.178)   |  | -0.131<br>(0.108)     | 0.068<br>(0.152)     |  |                       |                       |  |
| HSxAvoided <sub>t-1</sub> (ρ)                  | -0.006<br>(0.145)     | -0.453 ***<br>(0.093) |  |                       |                      |  |                       |                       |  |
| HSxWithdrawn <sub>t-1</sub> (ρ)                |                       |                       |  | -0.122<br>(0.127)     | -0.156<br>(0.112)    |  |                       |                       |  |
| High School                                    | 0.192 **<br>(0.062)   | 0.181 **<br>(0.064)   |  | 0.257 ***<br>(0.060)  | 0.241 ***<br>(0.065) |  |                       |                       |  |
| HSxGrade                                       | -0.307 ***<br>(0.040) | 0.302 ***<br>(0.038)  |  | -0.244 ***<br>(0.038) | 0.494 ***<br>(0.038) |  |                       |                       |  |
| <i>Level 2: Between Person Effects</i>         |                       |                       |  |                       |                      |  |                       |                       |  |
|                                                | $\alpha_{cigarettes}$ | $\alpha_{avoided}$    |  | $\alpha_{cigarettes}$ | $\alpha_{withdrawn}$ |  | $\alpha_{cigarettes}$ | $\alpha_{external}$   |  |
| Intercept                                      | 2.153 ***<br>(0.157)  | 2.531 ***<br>(0.094)  |  | 0.801 ***<br>(0.104)  | 2.318 ***<br>(0.118) |  | 2.211 ***<br>(0.140)  | -0.149 ***<br>(0.090) |  |
| Initial Obs<br>Cigarette <sub>t=0</sub>        | 2.405 ***<br>(0.092)  |                       |  | 1.970 ***<br>(0.083)  |                      |  | 3.167 ***<br>(0.112)  |                       |  |
| Initial Obs<br>Avoided <sub>t=0</sub>          |                       | 1.157 ***<br>(0.060)  |  |                       |                      |  |                       |                       |  |

| Variables                                 | Model 1    |            |  | Model 2    |            |  | Model 3    |            |  |  |
|-------------------------------------------|------------|------------|--|------------|------------|--|------------|------------|--|--|
|                                           | Cigarette  | Avoided    |  | Cigarette  | Withdrawn  |  | Cigarette  | External   |  |  |
| Initial Obs                               |            |            |  |            | 1.028 ***  |  |            |            |  |  |
| Withdrawn <sub>t=0</sub>                  |            |            |  |            | (0.064)    |  |            |            |  |  |
| Initial Obs                               |            |            |  |            |            |  |            | 1.281 ***  |  |  |
| External <sub>t=0</sub>                   |            |            |  |            |            |  |            | (0.045)    |  |  |
| Initial Obs                               | 0.335      | 0.261      |  | 0.741 **   | -0.437 *   |  |            |            |  |  |
| High School <sub>t=0</sub>                | (0.234)    | (0.203)    |  | (0.226)    | (0.205)    |  |            |            |  |  |
| Proportion Obs                            | 0.621 +    | -0.154     |  | -1.453 *** | 0.255      |  |            |            |  |  |
| In HS                                     | (0.363)    | (0.309)    |  | (0.333)    | (0.338)    |  |            |            |  |  |
| Grade                                     | 0.342 ***  | 0.262 ***  |  | 0.321 ***  | 0.414 ***  |  | 0.435 ***  | -0.069 +   |  |  |
|                                           | (0.038)    | (0.033)    |  | (0.036)    | (0.033)    |  | (0.065)    | (0.042)    |  |  |
| Mean Grade                                | -0.702 *** | -0.256 **  |  | -0.004     | -0.426 *** |  | -1.185 *** | 0.100 *    |  |  |
|                                           | (0.090)    | (0.083)    |  | (0.085)    | (0.088)    |  | (0.075)    | (0.042)    |  |  |
| Initial                                   | 0.050      | -0.067     |  | -0.126     | -0.055     |  |            |            |  |  |
| HSxGrade <sub>t=0</sub>                   | (0.141)    | (0.121)    |  | (0.135)    | (0.119)    |  |            |            |  |  |
| Proportion                                | -0.591 *** | -0.165     |  | -0.976 *** | -0.080     |  |            |            |  |  |
| HSxGrade = 1                              | (0.148)    | (0.140)    |  | (0.140)    | (0.142)    |  |            |            |  |  |
| Male                                      | -0.050     | 0.578 ***  |  | -0.137 **  | 0.997 ***  |  | 0.110 *    | 0.212 ***  |  |  |
|                                           | (0.044)    | (0.038)    |  | (0.042)    | (0.039)    |  | (0.055)    | (0.036)    |  |  |
| White                                     | 0.319 ***  | -0.360 *** |  | 0.163 **   | -0.577 *** |  | 0.348 ***  | 0.080      |  |  |
|                                           | (0.062)    | (0.049)    |  | (0.056)    | (0.051)    |  | (0.078)    | (0.046)    |  |  |
| Cohort                                    | -0.226 *** | -0.080 *   |  | -0.250 *** | -0.102 **  |  | -0.103 +   | -0.146 *** |  |  |
|                                           | (0.044)    | (0.038)    |  | (0.042)    | (0.039)    |  | (0.056)    | (0.035)    |  |  |
| Treatment Group                           | -0.006     | 0.005      |  | -0.028     | -0.134 **  |  | -0.014     | -0.208 *** |  |  |
|                                           | (0.044)    | (0.038)    |  | (0.042)    | (0.039)    |  | (0.055)    | (0.035)    |  |  |
| <i>Variance of Between-Person Effects</i> |            |            |  |            |            |  |            |            |  |  |
| Variance                                  | 3.056 ***  | 1.502 ***  |  | 2.585 ***  | 1.911 ***  |  | 3.796 ***  | 1.454 ***  |  |  |
|                                           | (0.104)    | (0.052)    |  | (0.077)    | (0.065)    |  | (0.216)    | (0.077)    |  |  |
| Covariance                                |            | 0.338 ***  |  |            | 0.409 ***  |  |            | 0.221 ***  |  |  |
| (with Cigarette)                          |            | (0.052)    |  |            | (0.049)    |  |            | (0.060)    |  |  |
| Observations                              |            | 63410      |  |            | 63410      |  |            | 33353      |  |  |
| BIC                                       |            | 961069     |  |            | 960957     |  |            | 364827     |  |  |
| LL                                        |            | -480098    |  |            | -480053    |  |            | -182244    |  |  |

Note: + p < 0.1 \* p < 0.05; \*\* p < .01; \*\*\* p < .001.

Table S-2. Full Results of multivariate logistic regression (Model 4).

| Variables                            | Cigarette             | Avoided               | Withdrawn             | External              |
|--------------------------------------|-----------------------|-----------------------|-----------------------|-----------------------|
| <i>Within Person</i>                 |                       |                       |                       |                       |
| Cigarette <sub>t-1</sub> (ρ)         | 1.282 ***<br>(0.072)  | 0.352 ***<br>(0.070)  | 0.383 ***<br>(0.068)  | -0.128 *<br>(0.051)   |
| Avoided <sub>t-1</sub> (ρ)           | -0.083<br>(0.078)     | 0.607 ***<br>(0.075)  | 0.041<br>(0.070)      | -0.068<br>(0.056)     |
| Withdrawn <sub>t-1</sub> (ρ)         | 0.036<br>(0.077)      | 0.119 +<br>(0.069)    | 0.355 ***<br>(0.076)  | 0.145 **<br>(0.053)   |
| External <sub>t-1</sub> (ρ)          | -0.092 +<br>(0.053)   | -0.067<br>(0.052)     | -0.188 ***<br>(0.050) | -0.458 ***<br>(0.041) |
| Grade                                | 0.523 ***<br>(0.021)  | 0.405 ***<br>(0.021)  | 0.551 ***<br>(0.025)  | -0.075 ***<br>(0.014) |
| <i>Between Person</i>                |                       |                       |                       |                       |
|                                      | $\alpha_{cigarettes}$ | $\alpha_{avoided}$    | $\alpha_{withdrawn}$  | $\alpha_{external}$   |
| Intercept                            | 2.181 ***<br>(0.116)  | -0.288 **<br>(0.090)  | 2.415 ***<br>(0.112)  | 1.893 ***<br>(0.126)  |
| Initial Obs Cigarette <sub>t=0</sub> | 2.887 ***<br>(0.105)  |                       |                       |                       |
| Initial Obs Avoided <sub>t=0</sub>   |                       | 1.661 ***<br>(0.081)  |                       |                       |
| Initial Obs Withdrawn <sub>t=0</sub> |                       |                       | 1.536 ***<br>(0.083)  |                       |
| Initial Obs External <sub>t=0</sub>  |                       |                       |                       | 1.176 ***<br>(0.045)  |
| Initial Obs Grade <sub>t=0</sub>     | 0.418 ***<br>(0.059)  | 0.496 ***<br>(0.056)  | 0.651 ***<br>(0.060)  | -0.065<br>(0.043)     |
| Mean Grade                           | -1.084 ***<br>(0.060) | -0.691 ***<br>(0.055) | -0.927 ***<br>(0.081) | 0.054<br>(0.042)      |
| Male                                 | 0.103 +<br>(0.053)    | 0.576 ***<br>(0.050)  | 0.988 ***<br>(0.050)  | -0.227 ***<br>(0.036) |
| White                                | 0.330 ***<br>(0.073)  | -0.518 ***<br>(0.068) | -0.605 ***<br>(0.070) | 0.086 +<br>(0.049)    |
| Cohort                               | -0.103 *<br>(0.052)   | -0.024<br>(0.050)     | -0.073<br>(0.048)     | -0.151 ***<br>(0.036) |
| Treatment Group                      | -0.023<br>(0.052)     | -0.034<br>(0.050)     | -0.193 ***<br>(0.050) | -0.216 ***<br>(0.035) |
| <i>Between-Person Covariance</i>     |                       |                       |                       |                       |
| Cigarette                            | 3.261 ***<br>(0.192)  | 0.127<br>(0.057)      | 0.466 ***<br>(0.084)  | 0.199 **<br>(0.061)   |
| Avoided                              |                       | 1.533 ***<br>(0.075)  | 1.456 ***<br>(0.082)  | -0.214 ***<br>(0.052) |
| Withdrawn                            |                       |                       | 2.253 ***<br>(0.139)  | -1.226 ***<br>(0.064) |

Table S-2. *Full Results of multivariate logistic regression (Model 4).*

| Variables | Cigarette | Avoided | Withdrawn | External             |
|-----------|-----------|---------|-----------|----------------------|
| External  |           |         |           | 2.522 ***<br>(0.173) |

Note: N=33,353; BIC=459,724. Gray shading indicates parameters not estimated in Models 1-3.  
 + p < 0.1 \* p < 0.05; \*\* p < .01; \*\*\* p < .001.

Table S-3: Comparison of effects estimated by ALT & Siena

| <b><u>Within Person</u></b> |         |         |           |          |
|-----------------------------|---------|---------|-----------|----------|
|                             | Smoking | Avoided | Withdrawn | External |
| Smoking                     |         |         |           |          |
| Avoided                     |         |         |           |          |
| Withdrawn                   |         |         |           |          |
| External                    |         |         |           |          |

  

| <b><u>Between Person</u></b> |         |         |           |          |
|------------------------------|---------|---------|-----------|----------|
|                              | Smoking | Avoided | Withdrawn | External |
| Smoking                      |         |         |           |          |
| Avoided                      |         |         |           |          |
| Withdrawn                    |         |         |           |          |
| External                     |         |         |           |          |

Possible with SAOM.
  Intractable with current SAOM software.
  No estimates available in current SAOM software.

Note: Table design is consistent with dynamic relationships: rows measure smoking or isolation dimensions at a given time, and columns represent a subsequent (future) measure. All effects are estimated in the ALT in Model 4. Within-person effects are reported in Table 2 and Table S-2, with between-person effects and the associated covariance matrix reported only in Table S-2. More particularly, the within-person effects are the  $\rho$  effects constituting the first 4x4 matrix of the ALT table. The between-person relationship is the combination of the between-person intercept and the covariance matrix (reported as the upper-right triangular portion of a symmetrical matrix at the bottom of Table S-2). This covariance is easily converted to a correlation matrix by pre- and post- multiplying by the inverse of the variance (which are the diagonals). These provide the between-person correlations for individual propensities to exhibit the behaviors. For purposes of this table, we also assume that external orientation will be treated as a behavior parameter in the SAOM.
